# Supplementary material for: Flood impact on urban roads and commuting: A case study of Wuhan, China
Source: Frontiers journal article supplement (doi:10.3389/fenvs.2022.1056854), 2022-11-11

# Appendix Tables

**Table A1**

Result of model calibration and validation by comparative analysis of calculated values (Ens) of main lake nodes in central Wuhan.

| Serial number | Name | Before calibration | One dimensional calibration | Two dimensional calibration |
| --- | --- | --- | --- | --- |
| 1 | Houguan Lake | -0.31 | 0.93 | 0.91 |
| 2 | Delta Lake | 0.37 | 0.71 | 0.61 |
| 3 | Beitaizi Lake | -5.95 | 0.24 | 0.31 |
| 4 | Longyang Lake | -5.51 | 0.43 | 0.59 |
| 5 | Wanjia Lake | -14.24 | 0.81 | 0.79 |
| 6 | Moon Lake | -1.07 | 0.52 | 0.52 |
| 7 | Lake Lianhuahu | -13.35 | 0.88 | 0.88 |

**Table A2**

Calculation of the weights on the basis of Saaty’s matrix for the determination of the severity weight of the three types of flood depth(m).

| **(a)** | **0-0.15** | | **0.15-0.3** | | **>0.3** | | **Mean of Weight** |
| --- | --- | --- | --- | --- | --- | --- | --- |
| **Relative Importance** | **Weight** | **Relative Importance** | **Weight** | **Relative Importance** | **Weight** |
| 0-0.15 | 1 | 0.09(1/11) | 1/3 | 0.08((1/3)/(13/3)) | 1/7 | 0.09((1/7)/(31/21)) | **0.09** |
| 0.15-0.3 | 3 | 0.27(3/11) | 1 | 0.23(1/(13/3)) | 1/3 | 0.23((1/3)/(31/21)) | **0.24** |
| >0.3 | 7 | 0.64(7/11) | 3 | 0.69(3/(13/3)) | 1 | 0.68(1/(31/21)) | **0.67** |
| Sum | 11 | 1 | 13/3 | 1 | 31/21 | 1 | **1** |

**Figure A1**

Spatial distribution map of flood area under three rainfall scenarios.


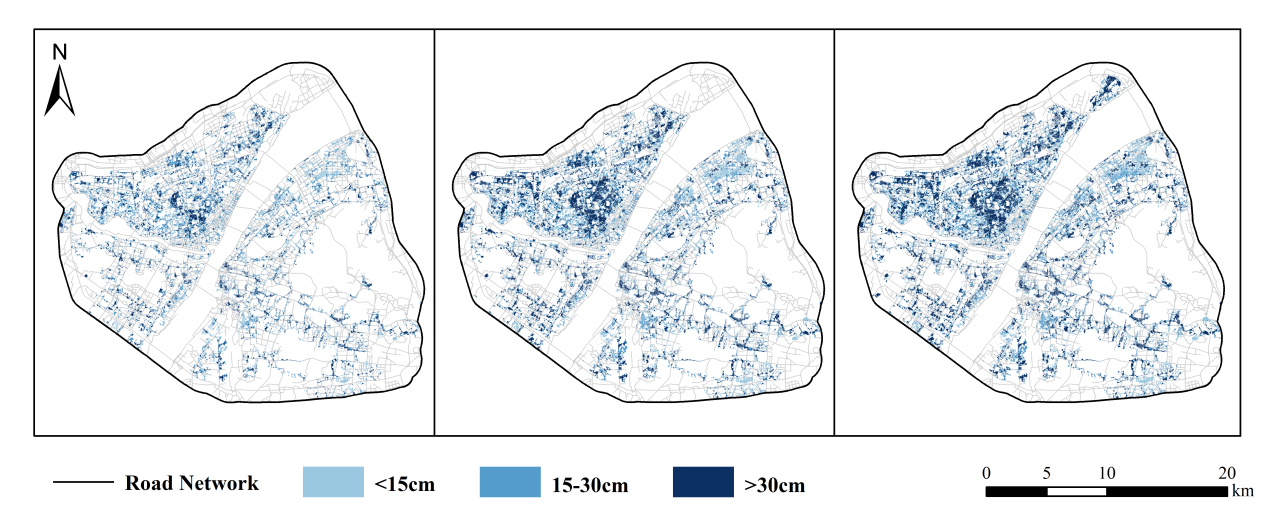

Supplement: Data_Sheet_1.docx [file Data_Sheet_1.docx]
